# Supplementary material for: EDGAR v4.3.2 Global Atlas of the three major Greenhouse Gas Emissions for the period 1970–2012
Source: Copernicus journal article supplement (doi:10.5194/essd-2018-164), 2019-01-28
Supplement: Supplementary file [file essd-2018-164-AC1-supplement.pdf]

**Comments on: “EDGAR v4.3.2 Global Atlas of the three major Greenhouse Gas Emissions for the period 1970-2012” (essd-2018-164)  
by G. Janssens-Maenhout et al.**

**REPLY TO THE REVIEW OF JANUARY 2019 BY PROF. D.J. CARLSON**

The authors thank Prof. Carlson for the positive and constructive review and confirm that the uncertainty analysis is progressing under the H2020 projects CHE and VERIFY.

Concerning the small technical points:

Page 3 and 4: Unfortunately the footnote 5 has been spread over two pages. This was not the case in the original pdf-file that was submitted, but escaped the attention of the authors when a new pdf was created. The authors will pay extra attention to this for the typesetting of the text in the ESSD journal.

Page 7: As indicated by the reviewer, the sentence needs to be corrected and the authors propose the following text: “Before undertaking an uncertainty analysis of the proxy data itself, we do recommend a sensitivity assessment of the representativeness of the selected proxy data using atmospheric transport model simulations. This is initiated in further work, as stipulated in the next section 2.5.”

Supplement: Indeed page 15, line 21 refers to Fig. S1 in the Supplementary, which is superfluous. The authors propose instead to change the reference in the brackets by “(see Fig. S1)”. The authors did not find any other self-reference in the Supplementary, but will pay extra attention to acronyms, references and footnotes for the entire manuscript. All co-authors will be solicited to help carefully proofreading the article.
